# Supplementary material for: The pivotal role of pyruvate dehydrogenase kinases in metabolic flexibility
Source: Springer Nature journal article supplement (doi:10.1186/1743-7075-11-10), 2014-02-12

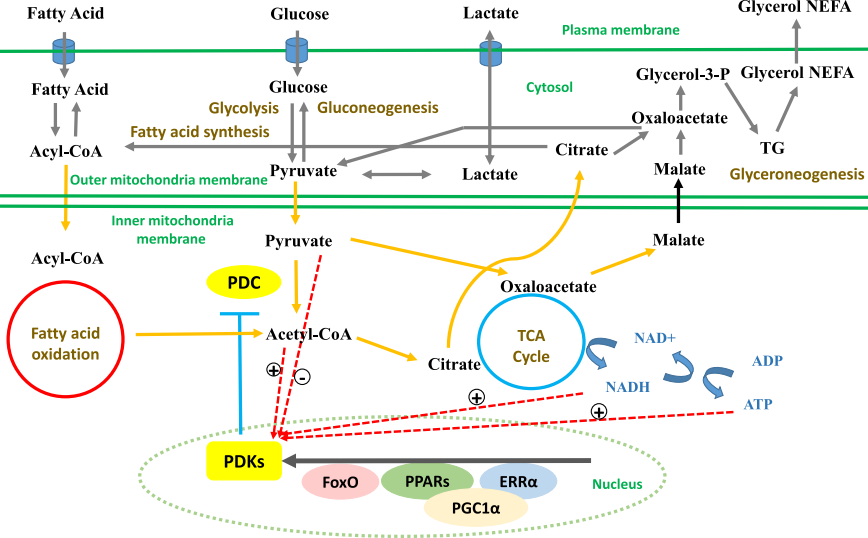

Supplement: 12986_2013_583_MOESM1_ESM.pdf [file 12986_2013_583_MOESM1_ESM.pdf]
